# Supplementary material
Source: publisher site journal article supplement (https://www.dovepress.com/article/444280)
Supplement: Supplementary file 1 [file get_supplementary_file.php]

Table S1 Primers of genes

| Gene | Forward primer | Reverse primer |
| --- | --- | --- |
| MRC1 | GGAAAGGATAAACCCTGGGCCATGA | AACCCAGAAGAGGAAGGTGTGGTTCC |
| MMP2 | GGAGCGCTACGATGGAGGCGCTAAT | TGTCCGTTTTGGGGGCGACA |
| CDH13 | GGCTGCTGCTGTCGCTCAAA | CCAGCTGGCTGGACAATAGG |
| TRIM28 | GCGACGGCACCGGTAAGTACGAAGT | CCACGTTCGTATGCAGGACCCAGA |
| GAPDH | GCCATGTTGCAACCGGGAAGGA | CAGCTAGCCTCGCTCCACCTGACTT |

Table S2. The associations between serum proteins and tissue and blood eosinophil

|  | Tissue eosinophil  count | |  | Tissue  eosinophil percentage | |  | Blood eosinophil count | |  | Blood eosinophil percentage | |
| --- | --- | --- | --- | --- | --- | --- | --- | --- | --- | --- | --- |
| r P | |  | r P | |  | r | P | | r P | |
| MRC1 | 0.433 | <0.001 |  | 0.469 | <0.001 |  | 0.147 | 0.189 |  | 0.161 | 0.151 |
| CDH13 | 0.290 | 0.009 |  | 0.236 | 0.034 |  | 0.127 | 0.259 |  | 0.128 | 0.255 |
| MMP2 | 0.556 | <0.001 |  | 0.576 | <0.001 |  | 0.214 | 0.055 |  | 0.297 | 0.007 |
| TRIM28 | 0.015 | 0.896 |  | 0.048 | 0.673 |  | 0.044 | 0.698 |  | 0.077 | 0.891 |

**Figure S1**

**
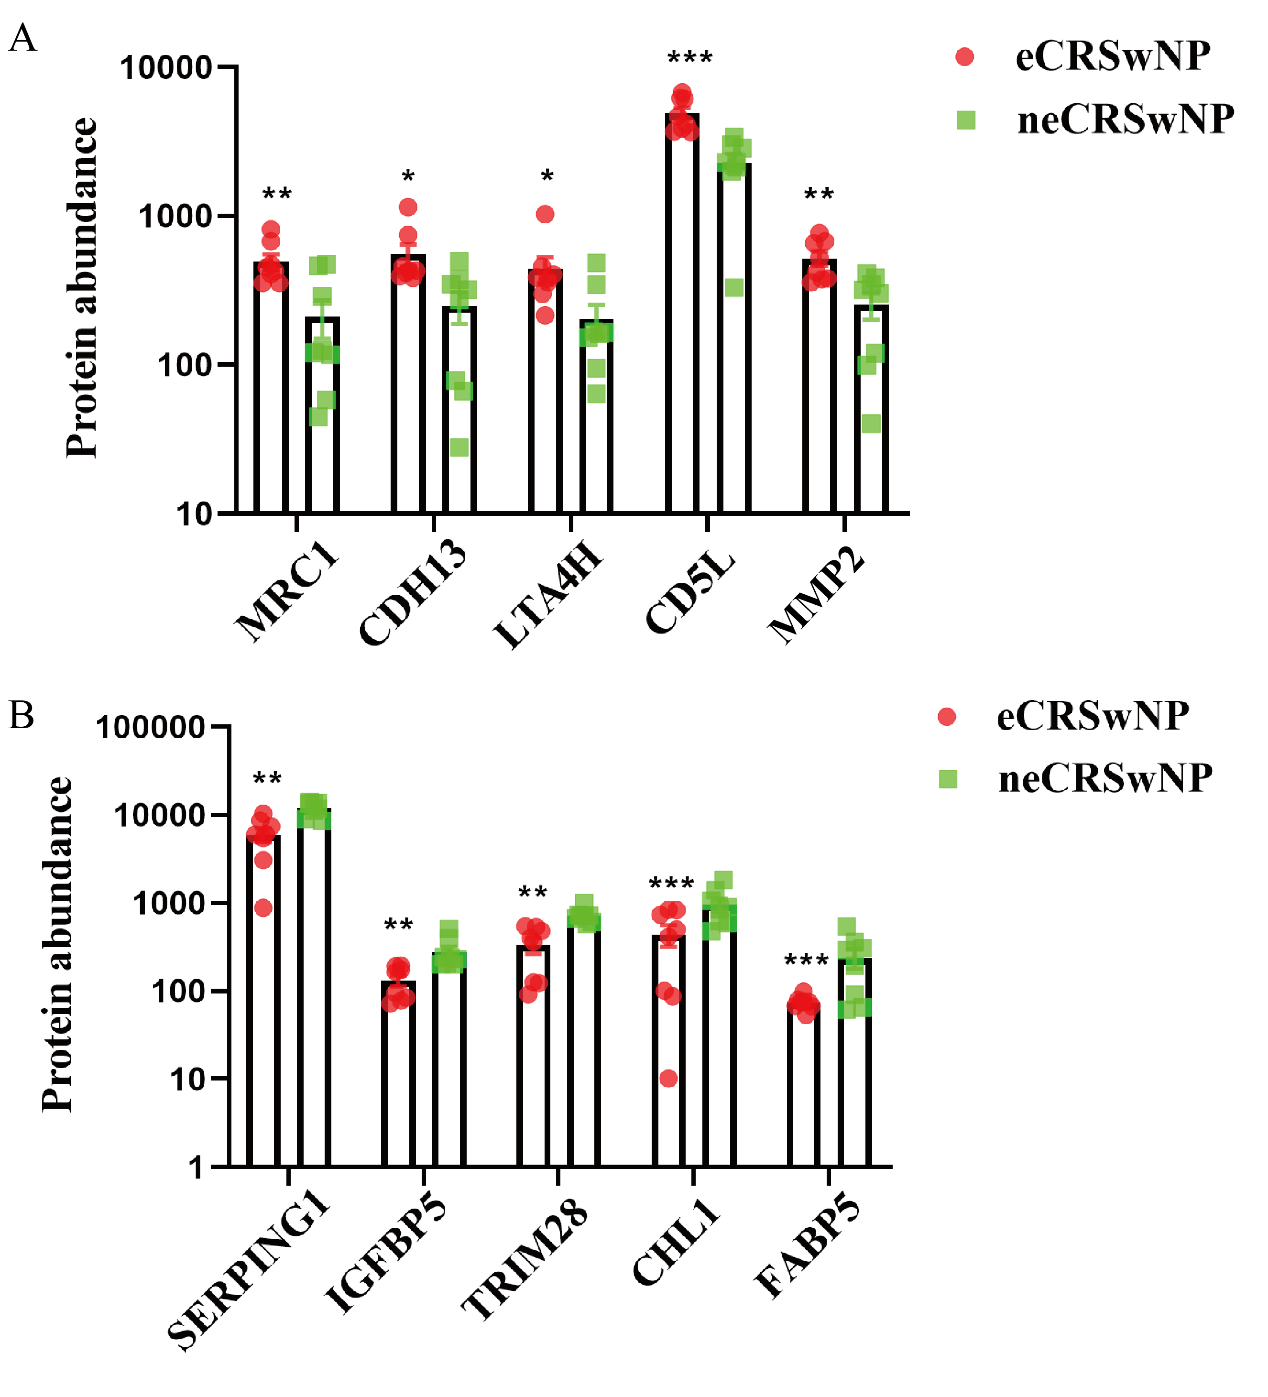
**

Figure S1. Comparisons of protein abundances between the two groups. *P<0.05, **P<0.01; ***P<0.001.
